# Supplementary material
Source: publisher figshare collection journal article supplement (https://acs.figshare.com/ndownloader/files/3758689)
Supplement: Supplementary file 1 [file 3758689]

Compound_ID	SMILES	HDAC6 IC50 (nM)	HDAC1 IC50 (nM)	HDAC2 IC50 (nM)	HDAC3 IC50 (nM)	HDAC4 IC50 (nM)	HDAC5 IC50 (nM)	HDAC7 IC50 (nM)	HDAC8 IC50 (nM)	HDAC9 IC50 (nM)	HDAC10 IC50 (nM)	HDAC11 IC50 (nM)
7a	CC1=NC2=CC=CC=C2C(N(C3=CC=C(OCC(NO)=O)C=C3)C)=N1	8.6 ¡À 1	172 ¡À 30						1181 ¡À 53
7b	CC1=NC2=CC=CC=C2C(N(C3=CC=C(OCCCC(NO)=O)C=C3)C)=N1	196 ¡À 32	84 ¡À 14						1465 ¡À 60
7c	CC1=NC2=CC=CC=C2C(N(C3=CC=C(OCCCCC(NO)=O)C=C3)C)=N1	57 ¡À 7	204 ¡À 23						1698 ¡À 189
7d	CC1=NC2=CC=CC=C2C(N(C3=CC=C(OCCCCCC(NO)=O)C=C3)C)=N1	34 ¡À 7	272 ¡À 36						1510 ¡À 323
10a	CN(C1=CC=C(OCC(NO)=O)C=C1)C2=NC=NC3=CC=CC=C32	14 ¡À 1	242 ¡À 27						1422 ¡À 79
10b	CN(C1=CC=C(OCCCC(NO)=O)C=C1)C2=NC=NC3=CC=CC=C32	34 ¡À 4	76 ¡À 9						2457 ¡À 20
10c	CN(C1=CC=C(OCCCCC(NO)=O)C=C1)C2=NC=NC3=CC=CC=C32	49 ¡À 7	203 ¡À 6						1326 ¡À 2
10d	CN(C1=CC=C(OCCCCCC(NO)=O)C=C1)C2=NC=NC3=CC=CC=C32	19 ¡À 5	176 ¡À 47						1058 ¡À 207
16a	CN(C1=CC=C(OCC(NO)=O)C=C1)C2=NC(C)=NC3=C2CCC3	17 ¡À 3	264 ¡À 55						2974 ¡À 627
16b	CN(C1=CC=C(OCCCC(NO)=O)C=C1)C2=NC(C)=NC3=C2CCC3	40 ¡À 3	195 ¡À 35						6190 ¡À 876
16c	CN(C1=CC=C(OCCCCC(NO)=O)C=C1)C2=NC(C)=NC3=C2CCC3	63 ¡À 11	212 ¡À 32						1987 ¡À 101
16d	CN(C1=CC=C(OCCCCCC(NO)=O)C=C1)C2=NC(C)=NC3=C2CCC3	20 ¡À 2	120 ¡À 24						1003 ¡À 176
23aa	CN(C1=CC(OCC(NO)=O)=CC=C1)C2=NC(C)=NC3=C2C=CC=C3	>1000	>1000						>1000
23ab	CN(C1=CC(OCCCC(NO)=O)=CC=C1)C2=NC(C)=NC3=C2C=CC=C3	>1000	>1000						>1000
23ac	CN(C1=CC(OCCCCC(NO)=O)=CC=C1)C2=NC(C)=NC3=C2C=CC=C3	>1000	306 ¡À 90						>1000
23ad	CN(C1=CC(OCCCCCC(NO)=O)=CC=C1)C2=NC(C)=NC3=C2C=CC=C3	>1000	73 ¡À 2						>1000
23ba	CN(C1=CC(OCC(NO)=O)=C(OC)C=C1)C2=NC(C)=NC3=C2C=CC=C3	>1000	>1000						>1000
23bb	CN(C1=CC(OCCCC(NO)=O)=C(OC)C=C1)C2=NC(C)=NC3=C2C=CC=C3	17 ¡À 2	422 ¡À 1	386 ¡À 7	439 ¡À 9	>10000	>10000	>10000	3398 ¡À 487	>10000	1176 ¡À 168	>10000
23bc	CN(C1=CC(OCCCCC(NO)=O)=C(OC)C=C1)C2=NC(C)=NC3=C2C=CC=C3	111 ¡À 30	253 ¡À 23						5189 ¡À 648
23bd	CN(C1=CC(OCCCCCC(NO)=O)=C(OC)C=C1)C2=NC(C)=NC3=C2C=CC=C3	23 ¡À 5	160 ¡À 3						1531 ¡À 78
27	CC1=NC2=C(C=CC=C2)C(NC3=CC(OCCCC(NO)=O)=C(OC)C=C3)=N1	>1000	>1000						>1000
